# Supplementary material for: Evaluation of various daily precipitation products for large-scale hydro-climatic applications over Canada
Source: Copernicus journal article supplement (doi:10.5194/hess-2016-511), 2016-10-13
Supplement: Supplementary file 1 [file hess-2016-511-supplement.pdf]

## List of Supplementary Tables

*Table S1 Numbers of precipitation-gauge stations within each major drainage area.*

| Region (Major Drainage Area) |                                 | Number of Precipitation-gauge Station |             |
|------------------------------|---------------------------------|---------------------------------------|-------------|
|                              |                                 | 1979 – 2012                           | 2002 – 2012 |
| 1                            | Maritime Provinces              | 5                                     | 4           |
| 2                            | St. Lawrence                    | 26                                    | 26          |
| 3                            | Great Lake                      | 13                                    | 11          |
| 4                            | Newfoundland                    | 3                                     | 2           |
| 5                            | Northern Quebec and Labrador    | 4                                     | 5           |
| 6                            | Southwestern Hudson Bay         | 3                                     | 4           |
| 7                            | Nelson River                    | 22                                    | 19          |
| 8                            | Western and Northern Hudson Bay | 7                                     | 7           |
| 9                            | Great Slave Lake                | 8                                     | 8           |
| 10                           | Pacific                         | 43                                    | 41          |
| 11                           | Yukon                           | 5                                     | 4           |
| 12                           | Arctic                          | 3                                     | 3           |
| 13                           | Mackenzie                       | 2                                     | 2           |
| 14                           | Mississippi                     | 1                                     | 1           |
| Total                        |                                 | 145                                   | 137         |

## List of Supplementary Figures

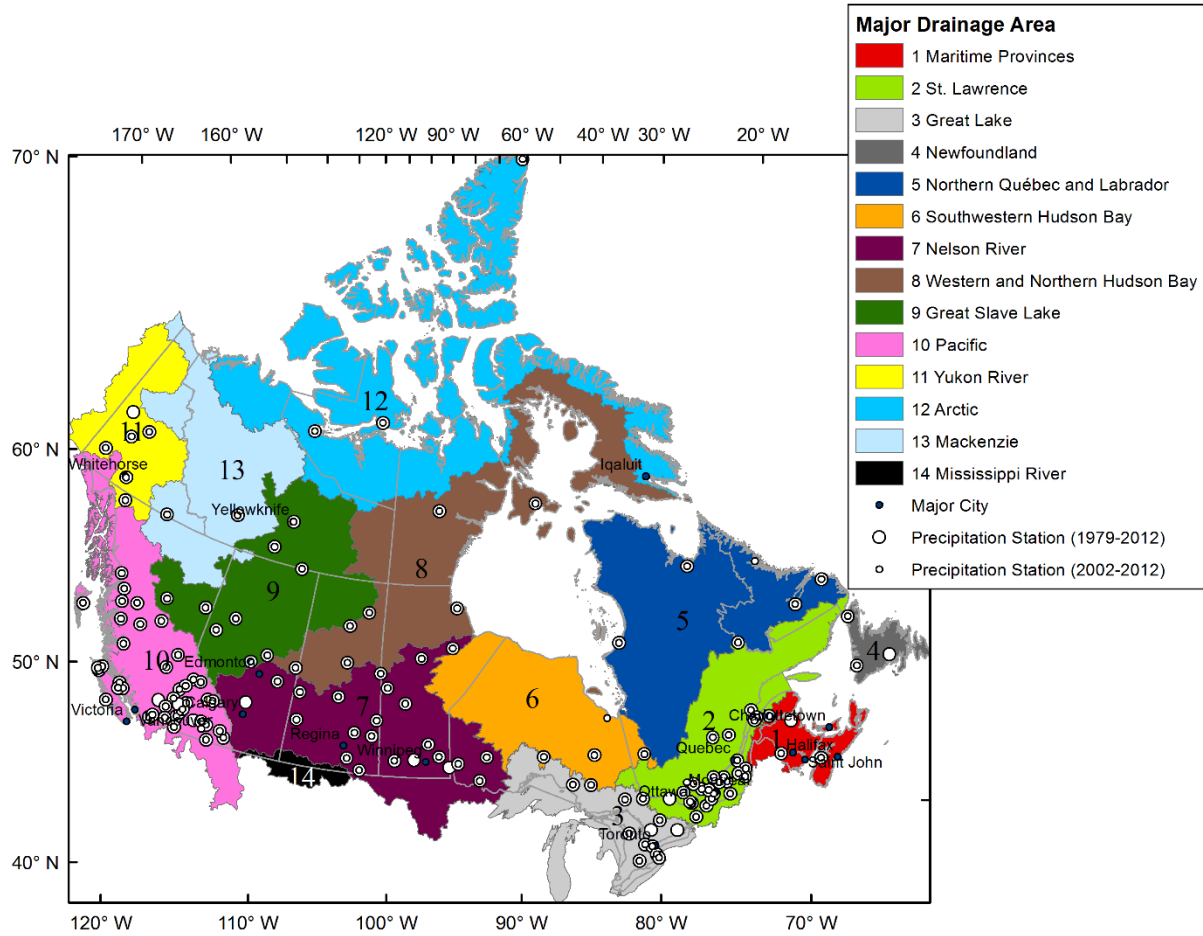

Figure S1. 14 major drainage areas of Canada with numerical codes indicating Region from 1 Maritime Provinces to 14 Mississippi River. Big (a total of 145) and small (a total of 137) white dots are the extracted precipitation-gauge stations from the Canadian adjusted and homogenized precipitation datasets of Mekis and Vincent (2011) for the period of 1979 to 2012 and 2002 to 2012 respectively. Black dots are major cities in Canada.

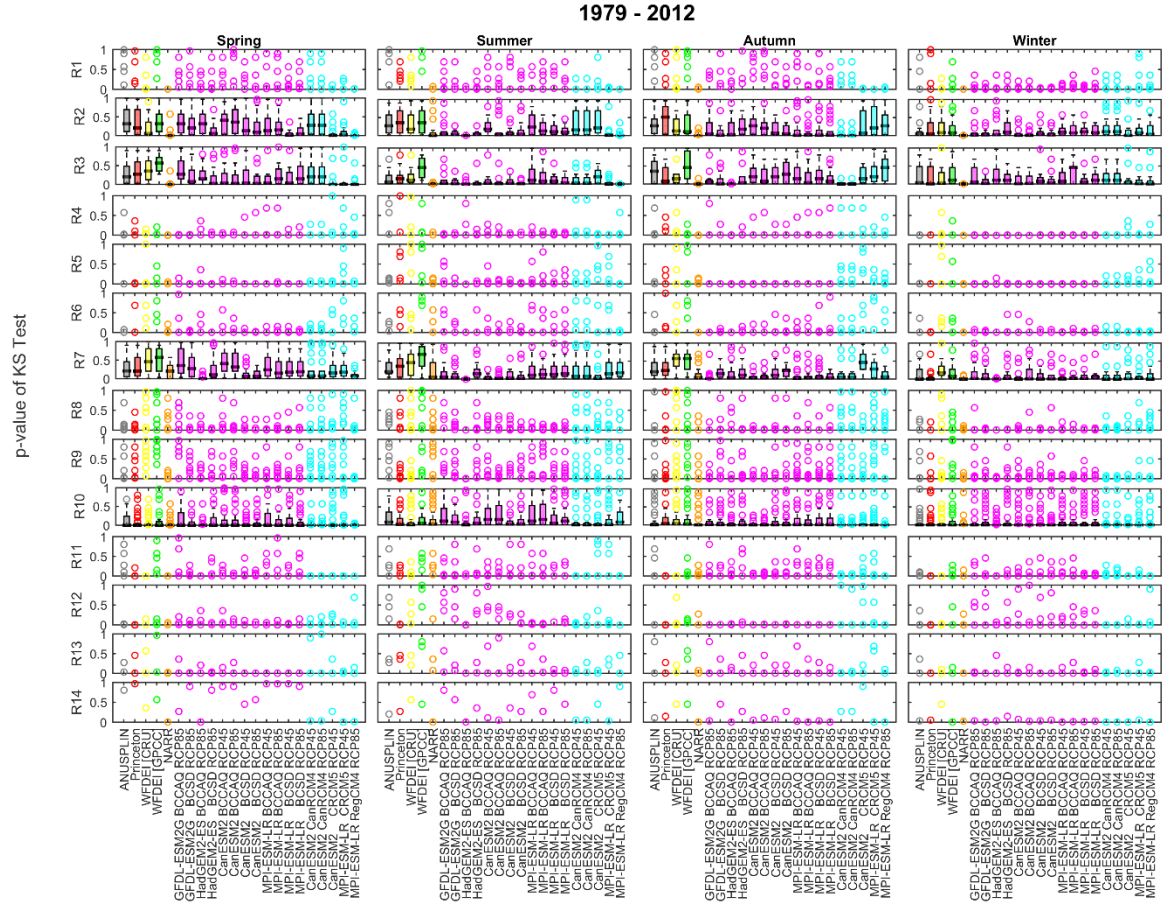

Figure S2. Distributions of  $p$ -value of the K-S test in the 14 major drainage areas in four seasons for the period of 1979 to 2012 (long-term comparison without CaPA). Note that the numbers of precipitation-gauge stations in each major drainage area are different (see Table S1). Each hollow circle represents one  $p$ -value of the K-S test conducted at one precipitation-gauge station. The  $p$ -values of Regions 2 to 3, 7, and 10 (R2-R3, R7, and R10), which have more than or equal to 10 stations, were shown in box-whisker plots with bottom, band (black thick line) and top of the box indicating the 25<sup>th</sup>, 50<sup>th</sup> (median), and 75<sup>th</sup> percentiles, respectively.

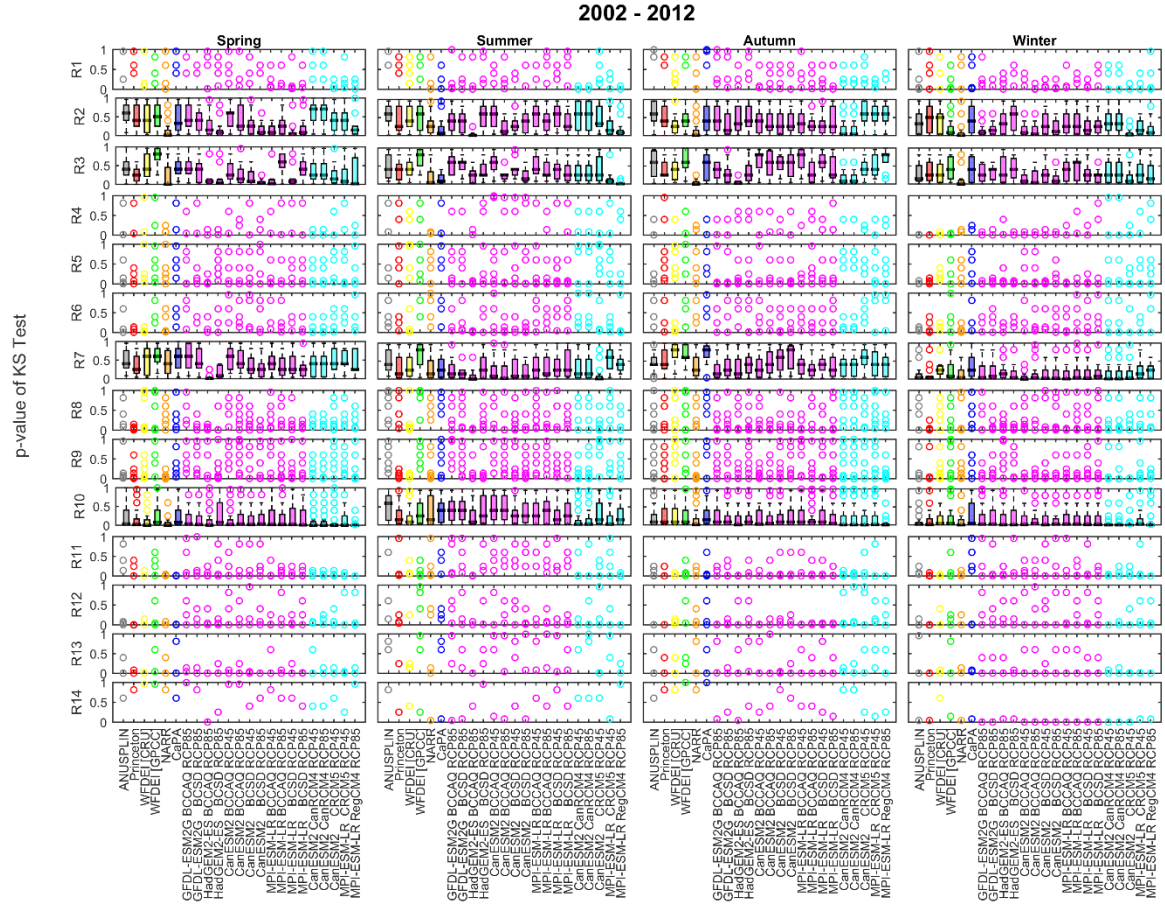

Figure S3. Distributions of  $p$ -value of the K-S test in the 14 major drainage areas in four seasons for the period of 2002 to 2012 (short-term comparison with the inclusion of CaPA). Note that the numbers of precipitation-gauge stations in each major drainage area are different (see Table S1). Each hollow circle represents one  $p$ -value of the K-S test conducted at one precipitation-gauge station. The  $p$ -values of Regions 2 to 3, 7, and 10 (R2-R3, R7, and R10), which have more than or equal to 10 stations, were shown in box-whisker plots with bottom, band (black thick line) and top of the box indicating the 25<sup>th</sup>, 50<sup>th</sup> (median), and 75<sup>th</sup> percentiles, respectively.

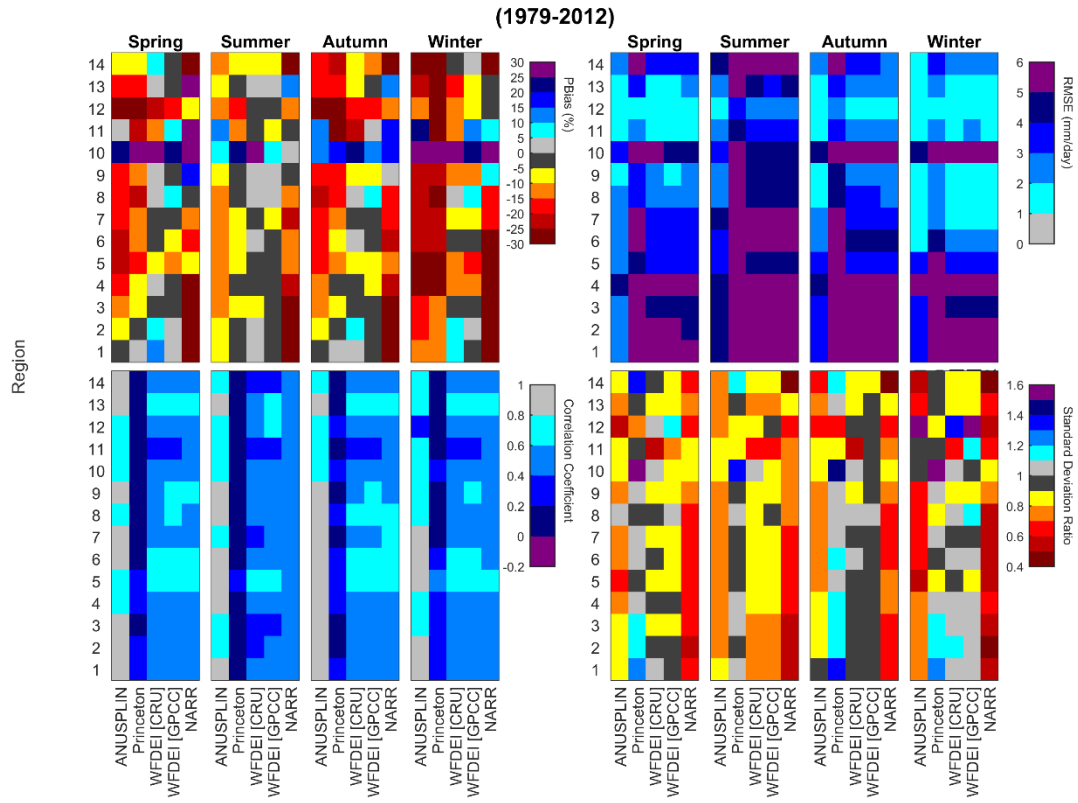

Figure S4. Portrait diagram showing the accuracy (PBias) (top left), magnitude of the errors (RMSE) (top right), strength and direction of relationship between gridded products and precipitation-gauge stations ( $r$ ) (bottom left), and amplitude of the variations ( $\sigma_G/\sigma_R$ ) (bottom right) of each type of gridded precipitation products when evaluating against the precipitation-gauge station data in each major drainage area (Region 1 to 14) in four seasons for the time period of 1979 to 2012. Each column indicates one gridded precipitation product and each row represents one major drainage area with numerical code corresponding to region shown in Fig. S1.

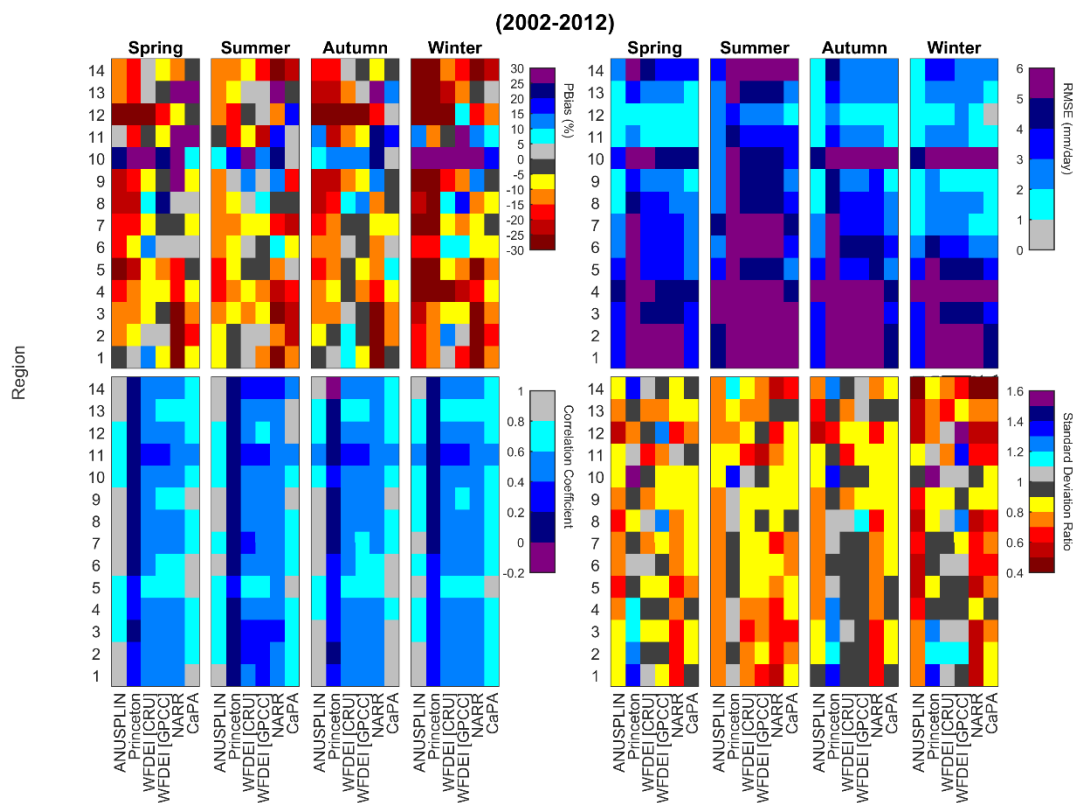

Figure S5. Portrait diagram showing the accuracy (PBias) (top left), magnitude of the errors (RMSE) (top right), strength and direction of relationship between gridded products and precipitation-gauge stations ( $r$ ) (bottom left), and amplitude of the variations ( $\sigma_G/\sigma_R$ ) (bottom right) of each type of gridded precipitation products when evaluating against the precipitation-gauge station data in each major drainage area (Region 1 to 14) in four seasons for the time period of 2002 to 2012. Each column indicates one gridded precipitation product and each row represents one major drainage area with numerical code corresponding to region shown in Fig. S1.
